# Supplementary material for: A mild one-pot synthesis of 2-iminothiazolines from thioureas and 1-bromo-1-nitroalkenes
Source: Royal Society of Chemistry journal article supplement (doi:10.1039/d0ra00686f), 2021-01-01

## Supplementary Information

for

### A Mild One-Pot Synthesis to 2-Iminothiazolines from Thioureas and 1-Bromo-1-nitroalkenes

Yuan Xu,<sup>a,b</sup> Xin Ge,<sup>b</sup> Yuhan Zhang,<sup>b</sup> Hongbin Zhang,<sup>a</sup> and Xue-Wei Liu<sup>b,\*</sup>

<sup>a</sup> Key Laboratory of Medicinal Chemistry for Natural Resource, Ministry of Education and Yunnan Province, School of Chemical Science and Technology, Yunnan University, Kunming 650091, China;

<sup>b</sup> Division of Chemistry and Biological Chemistry, School of Physical and Mathematical Sciences, Nanyang Technological University, Singapore 637371.

Email: [xuewei@ntu.edu.sg](mailto:xuewei@ntu.edu.sg)

| Table of contents                                                        | Pages   |
|--------------------------------------------------------------------------|---------|
| 1. X-ray data of compound <b>3a</b>                                      | S2-S9   |
| 2. <sup>1</sup> H and <sup>13</sup> C NMR data of compounds <b>3a-3n</b> | S10-S23 |

## 1. X-ray data of compound **3a**

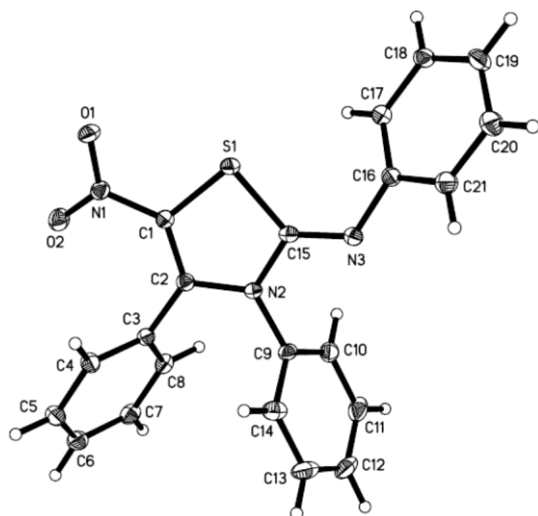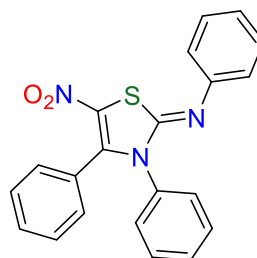

Table S1. Crystal data and structure refinement for compound **3a**.

|                                 |                                                                 |                                            |
|---------------------------------|-----------------------------------------------------------------|--------------------------------------------|
| Identification code             | <b>3a</b>                                                       |                                            |
| Empirical formula               | C <sub>21</sub> H <sub>15</sub> N <sub>3</sub> O <sub>2</sub> S |                                            |
| Formula weight                  | 373.42                                                          |                                            |
| Temperature                     | 103(2) K                                                        |                                            |
| Wavelength                      | 0.71073 Å                                                       |                                            |
| Crystal system                  | Monoclinic                                                      |                                            |
| Space group                     | C2/c                                                            |                                            |
| Unit cell dimensions            | a = 20.5389(5) Å<br>b = 9.3143(2) Å<br>c = 18.8825(4) Å         | a = 90°.<br>b = 103.7740(10)°.<br>g = 90°. |
| Volume                          | 3508.44(14) Å <sup>3</sup>                                      |                                            |
| Z                               | 8                                                               |                                            |
| Density (calculated)            | 1.414 Mg/m <sup>3</sup>                                         |                                            |
| Absorption coefficient          | 0.207 mm <sup>-1</sup>                                          |                                            |
| F(000)                          | 1552                                                            |                                            |
| Crystal size                    | 0.40 x 0.40 x 0.20 mm <sup>3</sup>                              |                                            |
| Theta range for data collection | 2.04 to 31.03°.                                                 |                                            |

|                                   |                                             |
|-----------------------------------|---------------------------------------------|
| Index ranges                      | -29<=h<=29, -7<=k<=13, -26<=l<=27           |
| Reflections collected             | 26512                                       |
| Independent reflections           | 5604 [R(int) = 0.0259]                      |
| Completeness to theta = 31.03°    | 99.7 %                                      |
| Absorption correction             | Semi-empirical from<br>equivalents          |
| Max. and min. transmission        | 0.9598 and 0.9219                           |
| Refinement method                 | Full-matrix least-squares on F <sup>2</sup> |
| Data / restraints / parameters    | 5604 / 0 / 244                              |
| Goodness-of-fit on F <sup>2</sup> | 1.169                                       |
| Final R indices [I>2sigma(I)]     | R1 = 0.0361, wR2 = 0.1008                   |
| R indices (all data)              | R1 = 0.0508, wR2 = 0.1265                   |
| Largest diff. peak and hole       | 0.690 and -0.562 e.Å <sup>-3</sup>          |

---

Table S2. Atomic coordinates ( $\times 10^4$ ) and equivalent isotropic displacement parameters ( $\text{\AA}^2 \times 10^3$ ) for liu76s. U(eq)

is defined as one third of the trace of the orthogonalized  $U^{ij}$  tensor.

|       | x       | y        | z       | U(eq) |
|-------|---------|----------|---------|-------|
| C(1)  | 1747(1) | 7370(1)  | 1985(1) | 15(1) |
| C(2)  | 1595(1) | 7296(1)  | 2650(1) | 14(1) |
| C(3)  | 1712(1) | 6112(1)  | 3185(1) | 14(1) |
| C(4)  | 1452(1) | 4755(1)  | 2973(1) | 16(1) |
| C(5)  | 1534(1) | 3651(1)  | 3480(1) | 19(1) |
| C(6)  | 1867(1) | 3904(2)  | 4201(1) | 20(1) |
| C(7)  | 2130(1) | 5251(2)  | 4412(1) | 19(1) |
| C(8)  | 2055(1) | 6361(1)  | 3907(1) | 16(1) |
| C(9)  | 1015(1) | 8721(1)  | 3426(1) | 15(1) |
| C(10) | 1314(1) | 9738(2)  | 3934(1) | 18(1) |
| C(11) | 1092(1) | 9884(2)  | 4571(1) | 25(1) |
| C(12) | 586(1)  | 9003(2)  | 4696(1) | 27(1) |
| C(13) | 285(1)  | 8005(2)  | 4176(1) | 26(1) |
| C(14) | 496(1)  | 7859(2)  | 3532(1) | 20(1) |
| C(15) | 1176(1) | 9581(1)  | 2244(1) | 13(1) |
| C(16) | 811(1)  | 11833(1) | 1777(1) | 15(1) |
| C(17) | 1354(1) | 12329(1) | 1520(1) | 16(1) |
| C(18) | 1271(1) | 13473(1) | 1034(1) | 18(1) |
| C(19) | 655(1)  | 14146(2) | 811(1)  | 21(1) |
| C(20) | 114(1)  | 13662(2) | 1072(1) | 23(1) |
| C(21) | 190(1)  | 12512(2) | 1554(1) | 19(1) |
| N(1)  | 2113(1) | 6370(1)  | 1672(1) | 16(1) |
| N(2)  | 1268(1) | 8518(1)  | 2785(1) | 13(1) |
| N(3)  | 876(1)  | 10746(1) | 2309(1) | 15(1) |
| O(1)  | 2108(1) | 6562(1)  | 1018(1) | 20(1) |
| O(2)  | 2416(1) | 5379(1)  | 2040(1) | 20(1) |
| S(1)  | 1503(1) | 8959(1)  | 1511(1) | 15(1) |

Table S3. Bond lengths [ $\text{\AA}$ ] and angles [ $^\circ$ ] for liu76s.

---

|             |            |
|-------------|------------|
| C(1)-C(2)   | 1.3656(16) |
| C(1)-N(1)   | 1.4125(16) |
| C(1)-S(1)   | 1.7401(13) |
| C(2)-N(2)   | 1.3756(16) |
| C(2)-C(3)   | 1.4761(17) |
| C(3)-C(4)   | 1.3927(17) |
| C(3)-C(8)   | 1.3978(17) |
| C(4)-C(5)   | 1.3884(18) |
| C(4)-H(4)   | 0.9500     |
| C(5)-C(6)   | 1.391(2)   |
| C(5)-H(5)   | 0.9500     |
| C(6)-C(7)   | 1.387(2)   |
| C(6)-H(6)   | 0.9500     |
| C(7)-C(8)   | 1.3892(18) |
| C(7)-H(7)   | 0.9500     |
| C(8)-H(8)   | 0.9500     |
| C(9)-C(10)  | 1.3829(18) |
| C(9)-C(14)  | 1.3865(18) |
| C(9)-N(2)   | 1.4402(15) |
| C(10)-C(11) | 1.3900(18) |
| C(10)-H(10) | 0.9500     |
| C(11)-C(12) | 1.386(2)   |
| C(11)-H(11) | 0.9500     |
| C(12)-C(13) | 1.386(2)   |
| C(12)-H(12) | 0.9500     |
| C(13)-C(14) | 1.3922(19) |
| C(13)-H(13) | 0.9500     |
| C(14)-H(14) | 0.9500     |
| C(15)-N(3)  | 1.2687(16) |
| C(15)-N(2)  | 1.4030(15) |
| C(15)-S(1)  | 1.7714(12) |
| C(16)-C(21) | 1.3968(18) |
| C(16)-C(17) | 1.3973(18) |
| C(16)-N(3)  | 1.4095(16) |
| C(17)-C(18) | 1.3902(18) |
| C(17)-H(17) | 0.9500     |
| C(18)-C(19) | 1.385(2)   |
| C(18)-H(18) | 0.9500     |

|                   |            |
|-------------------|------------|
| C(19)-C(20)       | 1.392(2)   |
| C(19)-H(19)       | 0.9500     |
| C(20)-C(21)       | 1.3907(19) |
| C(20)-H(20)       | 0.9500     |
| C(21)-H(21)       | 0.9500     |
| N(1)-O(2)         | 1.2307(15) |
| N(1)-O(1)         | 1.2454(14) |
|                   |            |
| C(2)-C(1)-N(1)    | 127.72(11) |
| C(2)-C(1)-S(1)    | 114.51(9)  |
| N(1)-C(1)-S(1)    | 117.60(9)  |
| C(1)-C(2)-N(2)    | 110.89(11) |
| C(1)-C(2)-C(3)    | 129.18(11) |
| N(2)-C(2)-C(3)    | 119.89(10) |
| C(4)-C(3)-C(8)    | 120.06(12) |
| C(4)-C(3)-C(2)    | 119.51(11) |
| C(8)-C(3)-C(2)    | 120.37(11) |
| C(5)-C(4)-C(3)    | 119.92(12) |
| C(5)-C(4)-H(4)    | 120.0      |
| C(3)-C(4)-H(4)    | 120.0      |
| C(4)-C(5)-C(6)    | 120.02(13) |
| C(4)-C(5)-H(5)    | 120.0      |
| C(6)-C(5)-H(5)    | 120.0      |
| C(7)-C(6)-C(5)    | 120.09(12) |
| C(7)-C(6)-H(6)    | 120.0      |
| C(5)-C(6)-H(6)    | 120.0      |
| C(6)-C(7)-C(8)    | 120.31(12) |
| C(6)-C(7)-H(7)    | 119.8      |
| C(8)-C(7)-H(7)    | 119.8      |
| C(7)-C(8)-C(3)    | 119.58(12) |
| C(7)-C(8)-H(8)    | 120.2      |
| C(3)-C(8)-H(8)    | 120.2      |
| C(10)-C(9)-C(14)  | 121.75(12) |
| C(10)-C(9)-N(2)   | 118.95(11) |
| C(14)-C(9)-N(2)   | 119.26(12) |
| C(9)-C(10)-C(11)  | 118.92(13) |
| C(9)-C(10)-H(10)  | 120.5      |
| C(11)-C(10)-H(10) | 120.5      |
| C(12)-C(11)-C(10) | 120.18(14) |
| C(12)-C(11)-H(11) | 119.9      |
| C(10)-C(11)-H(11) | 119.9      |
| C(13)-C(12)-C(11) | 120.19(13) |
| C(13)-C(12)-H(12) | 119.9      |
| C(11)-C(12)-H(12) | 119.9      |
| C(12)-C(13)-C(14) | 120.29(14) |
| C(12)-C(13)-H(13) | 119.9      |
| C(14)-C(13)-H(13) | 119.9      |
| C(9)-C(14)-C(13)  | 118.64(14) |

|                   |            |
|-------------------|------------|
| C(9)-C(14)-H(14)  | 120.7      |
| C(13)-C(14)-H(14) | 120.7      |
| N(3)-C(15)-N(2)   | 121.13(11) |
| N(3)-C(15)-S(1)   | 129.69(10) |
| N(2)-C(15)-S(1)   | 109.13(9)  |
| C(21)-C(16)-C(17) | 119.58(12) |
| C(21)-C(16)-N(3)  | 117.70(11) |
| C(17)-C(16)-N(3)  | 122.48(11) |
| C(18)-C(17)-C(16) | 120.02(12) |
| C(18)-C(17)-H(17) | 120.0      |
| C(16)-C(17)-H(17) | 120.0      |
| C(19)-C(18)-C(17) | 120.46(12) |
| C(19)-C(18)-H(18) | 119.8      |
| C(17)-C(18)-H(18) | 119.8      |
| C(18)-C(19)-C(20) | 119.63(13) |
| C(18)-C(19)-H(19) | 120.2      |
| C(20)-C(19)-H(19) | 120.2      |
| C(21)-C(20)-C(19) | 120.49(13) |
| C(21)-C(20)-H(20) | 119.8      |
| C(19)-C(20)-H(20) | 119.8      |
| C(20)-C(21)-C(16) | 119.82(13) |
| C(20)-C(21)-H(21) | 120.1      |
| C(16)-C(21)-H(21) | 120.1      |
| O(2)-N(1)-O(1)    | 123.45(11) |
| O(2)-N(1)-C(1)    | 120.47(10) |
| O(1)-N(1)-C(1)    | 116.07(11) |
| C(2)-N(2)-C(15)   | 115.85(10) |
| C(2)-N(2)-C(9)    | 123.66(10) |
| C(15)-N(2)-C(9)   | 120.48(10) |
| C(15)-N(3)-C(16)  | 120.72(11) |
| C(1)-S(1)-C(15)   | 89.60(6)   |

---

Symmetry transformations used to generate equivalent atoms.

Table S4. Anisotropic displacement parameters ( $\text{\AA}^2 \times 10^3$ ) for liu76s. The anisotropic displacement factor exponent takes the form:  $-2^{-2} [h^2 a^* U^{11} + \dots + 2 h k a^* b^* U^{12}]$

|       | U <sup>11</sup> | U <sup>22</sup> | U <sup>33</sup> | U <sup>23</sup> | U <sup>13</sup> | U <sup>12</sup> |
|-------|-----------------|-----------------|-----------------|-----------------|-----------------|-----------------|
| C(1)  | 18(1)           | 13(1)           | 14(1)           | 0(1)            | 5(1)            | 0(1)            |
| C(2)  | 14(1)           | 13(1)           | 14(1)           | 0(1)            | 3(1)            | -1(1)           |
| C(3)  | 14(1)           | 14(1)           | 14(1)           | 1(1)            | 5(1)            | 1(1)            |
| C(4)  | 17(1)           | 14(1)           | 16(1)           | 0(1)            | 4(1)            | 0(1)            |
| C(5)  | 20(1)           | 15(1)           | 23(1)           | 2(1)            | 7(1)            | 0(1)            |
| C(6)  | 23(1)           | 21(1)           | 20(1)           | 7(1)            | 8(1)            | 6(1)            |
| C(7)  | 20(1)           | 24(1)           | 14(1)           | 2(1)            | 4(1)            | 6(1)            |
| C(8)  | 16(1)           | 18(1)           | 15(1)           | -2(1)           | 4(1)            | 2(1)            |
| C(9)  | 17(1)           | 17(1)           | 12(1)           | 4(1)            | 6(1)            | 4(1)            |
| C(10) | 24(1)           | 17(1)           | 15(1)           | 1(1)            | 6(1)            | 4(1)            |
| C(11) | 36(1)           | 24(1)           | 16(1)           | 0(1)            | 8(1)            | 11(1)           |
| C(12) | 31(1)           | 35(1)           | 19(1)           | 10(1)           | 14(1)           | 19(1)           |
| C(13) | 19(1)           | 36(1)           | 25(1)           | 14(1)           | 12(1)           | 8(1)            |
| C(14) | 17(1)           | 25(1)           | 19(1)           | 6(1)            | 5(1)            | 1(1)            |
| C(15) | 14(1)           | 15(1)           | 11(1)           | 1(1)            | 4(1)            | -2(1)           |
| C(16) | 18(1)           | 13(1)           | 12(1)           | 0(1)            | 4(1)            | 0(1)            |
| C(17) | 18(1)           | 15(1)           | 16(1)           | 1(1)            | 5(1)            | 0(1)            |
| C(18) | 23(1)           | 14(1)           | 17(1)           | -1(1)           | 8(1)            | -3(1)           |
| C(19) | 29(1)           | 17(1)           | 18(1)           | 5(1)            | 6(1)            | 2(1)            |
| C(20) | 23(1)           | 24(1)           | 23(1)           | 7(1)            | 5(1)            | 6(1)            |
| C(21) | 18(1)           | 20(1)           | 20(1)           | 3(1)            | 6(1)            | 2(1)            |
| N(1)  | 15(1)           | 16(1)           | 17(1)           | -3(1)           | 6(1)            | -2(1)           |
| N(2)  | 17(1)           | 13(1)           | 11(1)           | 1(1)            | 6(1)            | 1(1)            |
| N(3)  | 16(1)           | 15(1)           | 15(1)           | 2(1)            | 5(1)            | 1(1)            |
| O(1)  | 29(1)           | 20(1)           | 15(1)           | -2(1)           | 11(1)           | -3(1)           |
| O(2)  | 19(1)           | 21(1)           | 22(1)           | 1(1)            | 6(1)            | 6(1)            |
| S(1)  | 20(1)           | 15(1)           | 12(1)           | 1(1)            | 6(1)            | 0(1)            |



Table S5. Hydrogen coordinates ( $\times 10^4$ ) and isotropic displacement parameters ( $\text{\AA}^2 \times 10^{-3}$ ) for liu76s.

|       | x    | y     | z    | U(eq) |
|-------|------|-------|------|-------|
| H(4)  | 1220 | 4585  | 2481 | 19    |
| H(5)  | 1361 | 2722  | 3335 | 23    |
| H(6)  | 1914 | 3153  | 4550 | 25    |
| H(7)  | 2363 | 5416  | 4903 | 23    |
| H(8)  | 2236 | 7283  | 4052 | 19    |
| H(10) | 1666 | 10326 | 3850 | 22    |
| H(11) | 1286 | 10589 | 4921 | 30    |
| H(12) | 446  | 9085  | 5138 | 32    |
| H(13) | -67  | 7417  | 4261 | 31    |
| H(14) | 289  | 7183  | 3172 | 24    |
| H(17) | 1781 | 11886 | 1678 | 19    |
| H(18) | 1640 | 13795 | 853  | 21    |
| H(19) | 601  | 14932 | 482  | 26    |
| H(20) | -309 | 14122 | 920  | 28    |
| H(21) | -181 | 12189 | 1731 | 23    |

## 2. $^1\text{H}$ and $^{13}\text{C}$ NMR of compounds 3a-3n

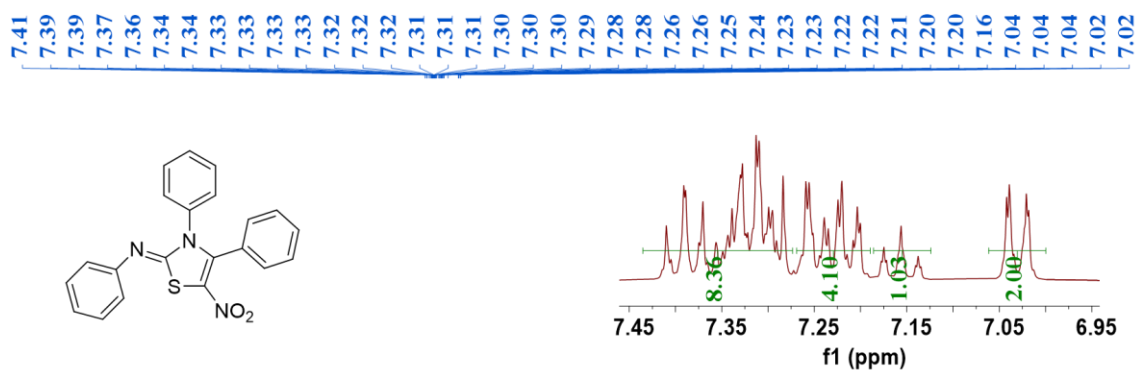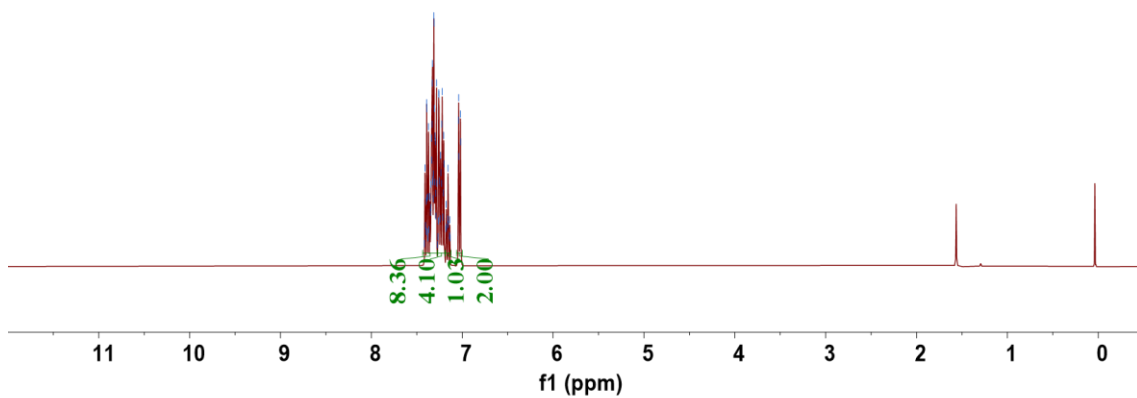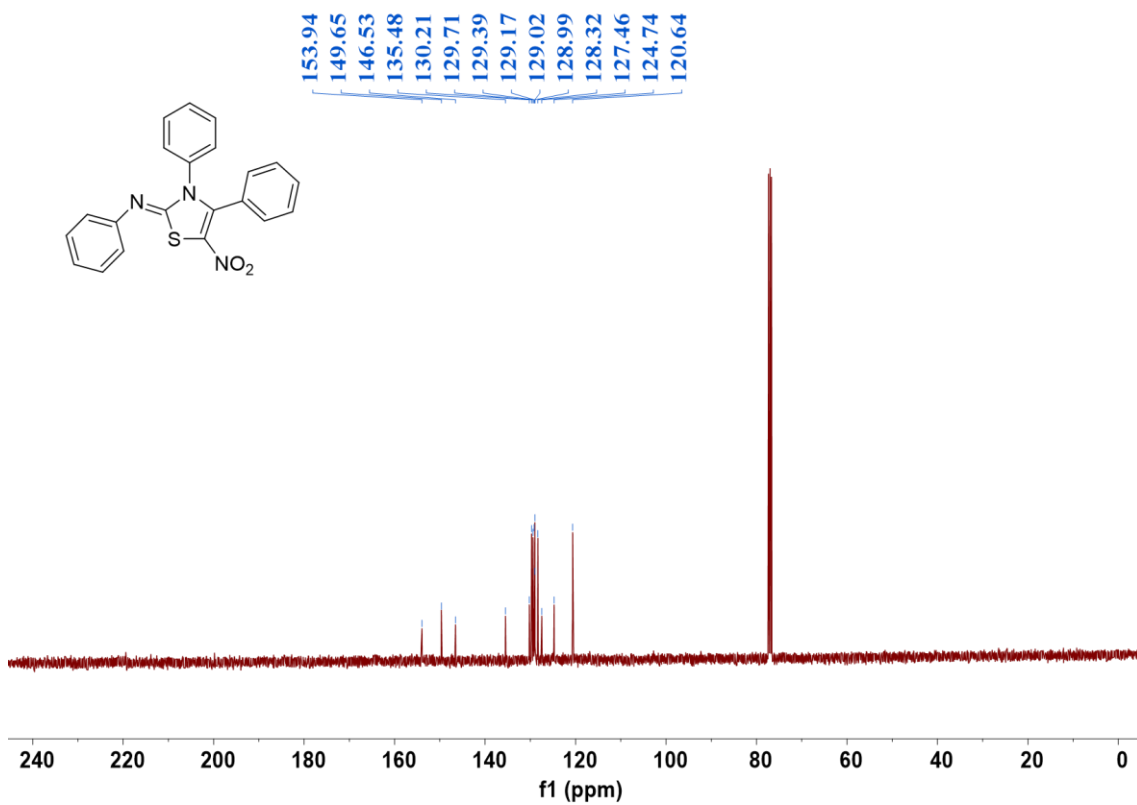

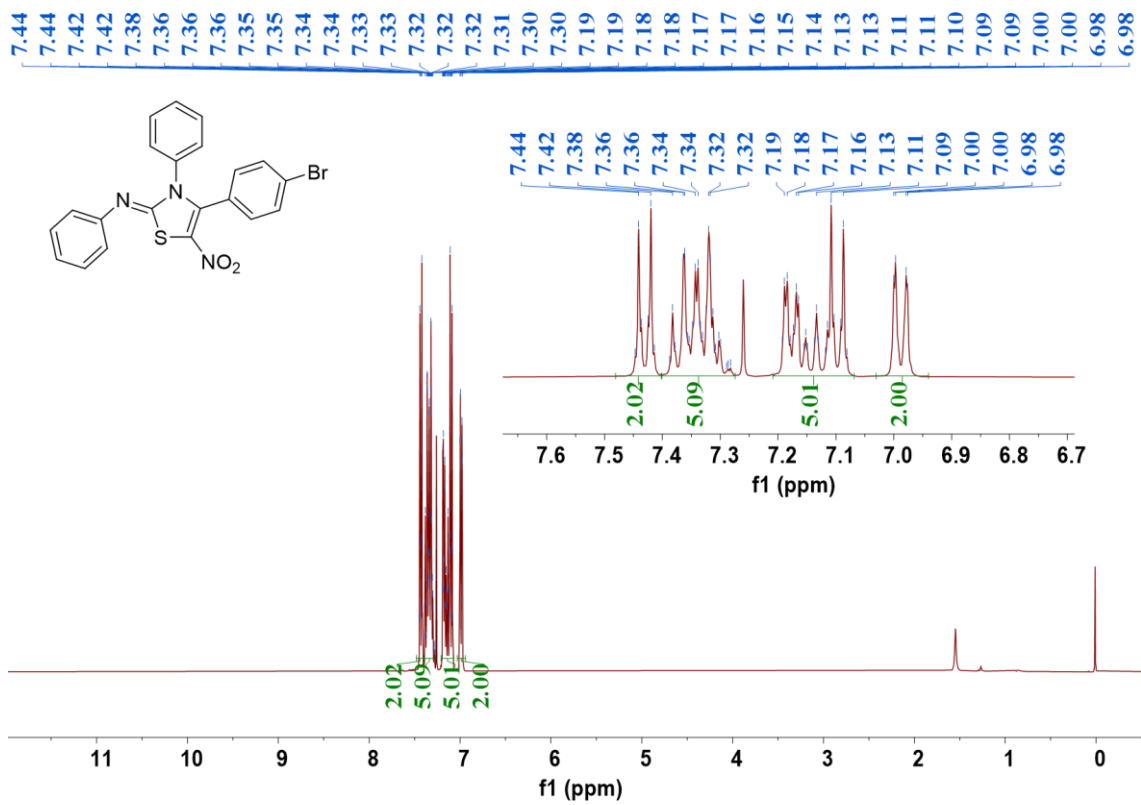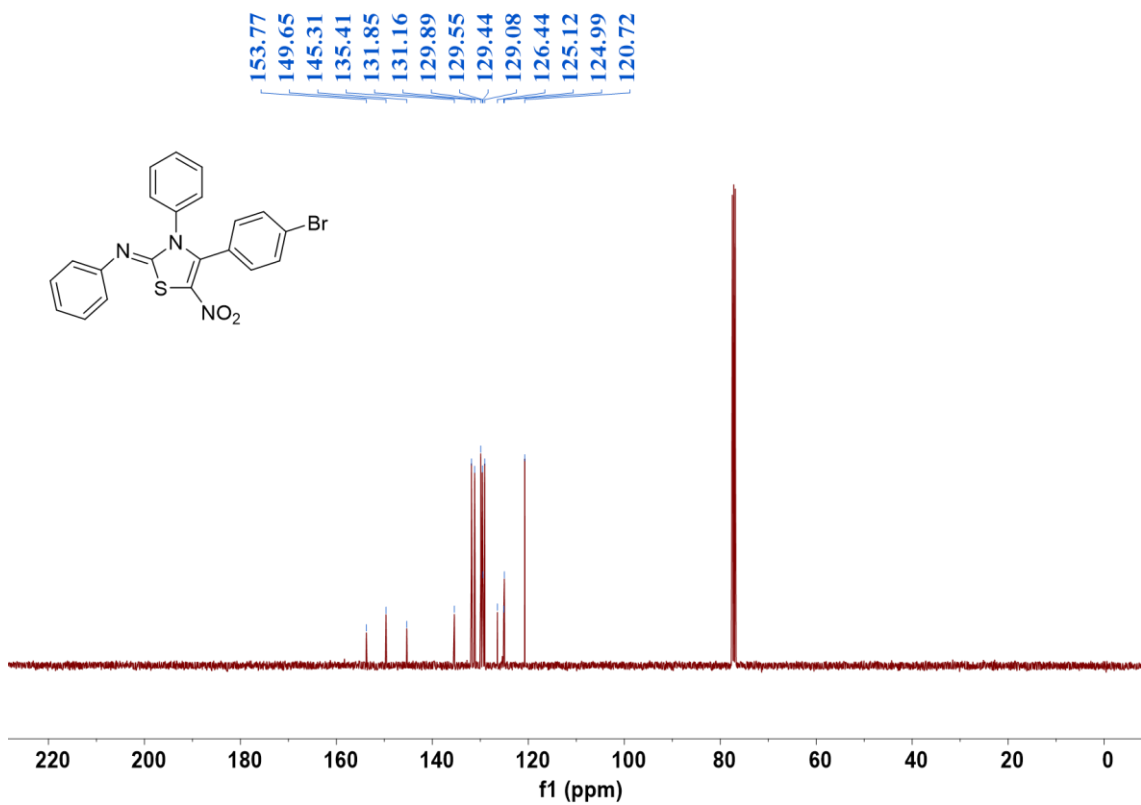

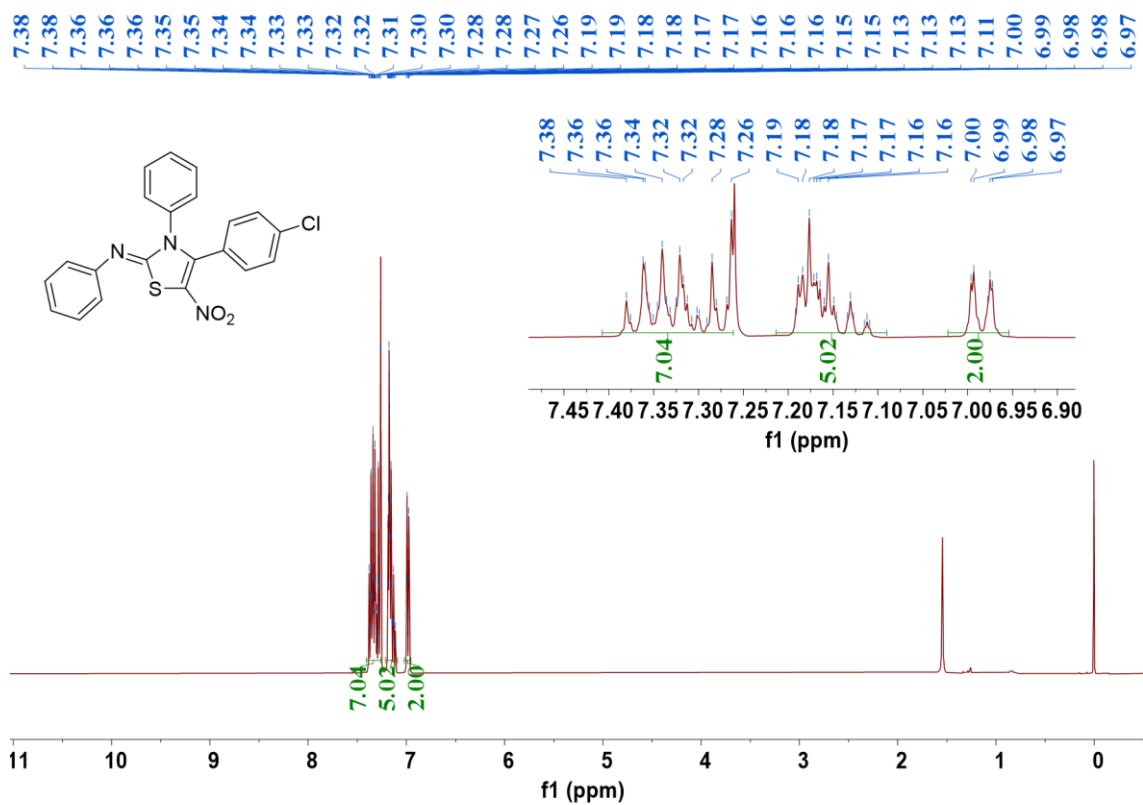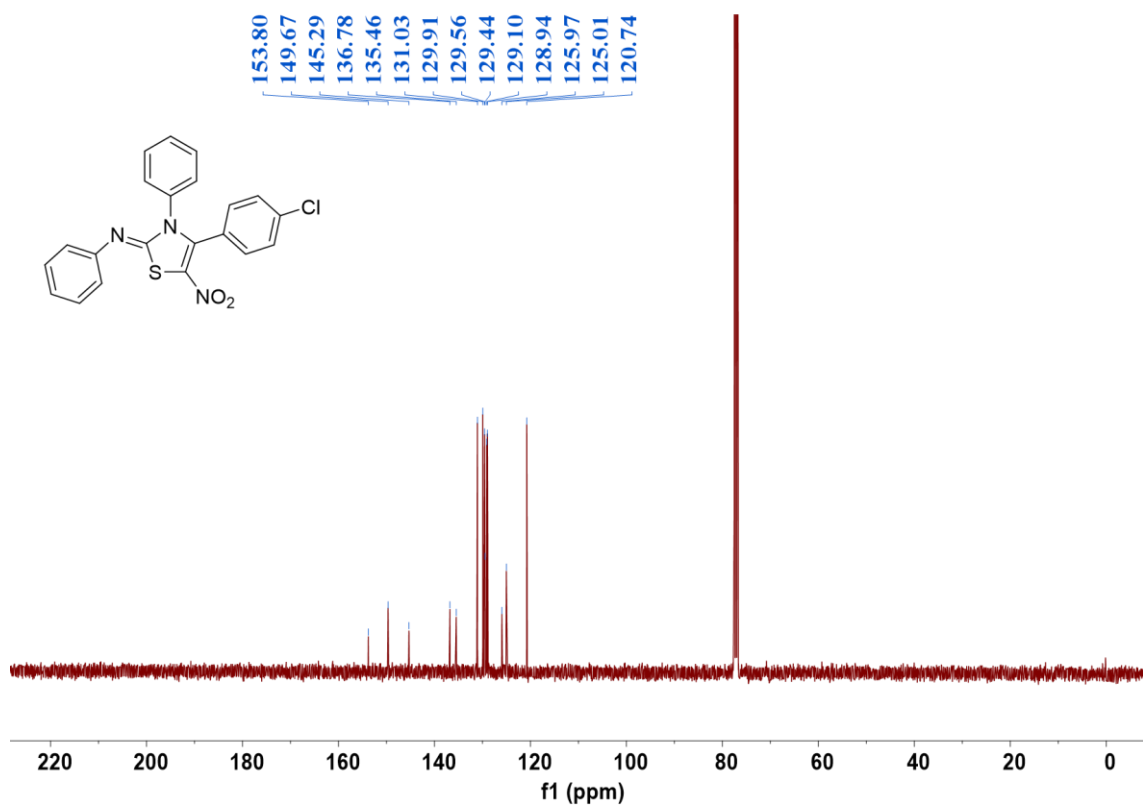

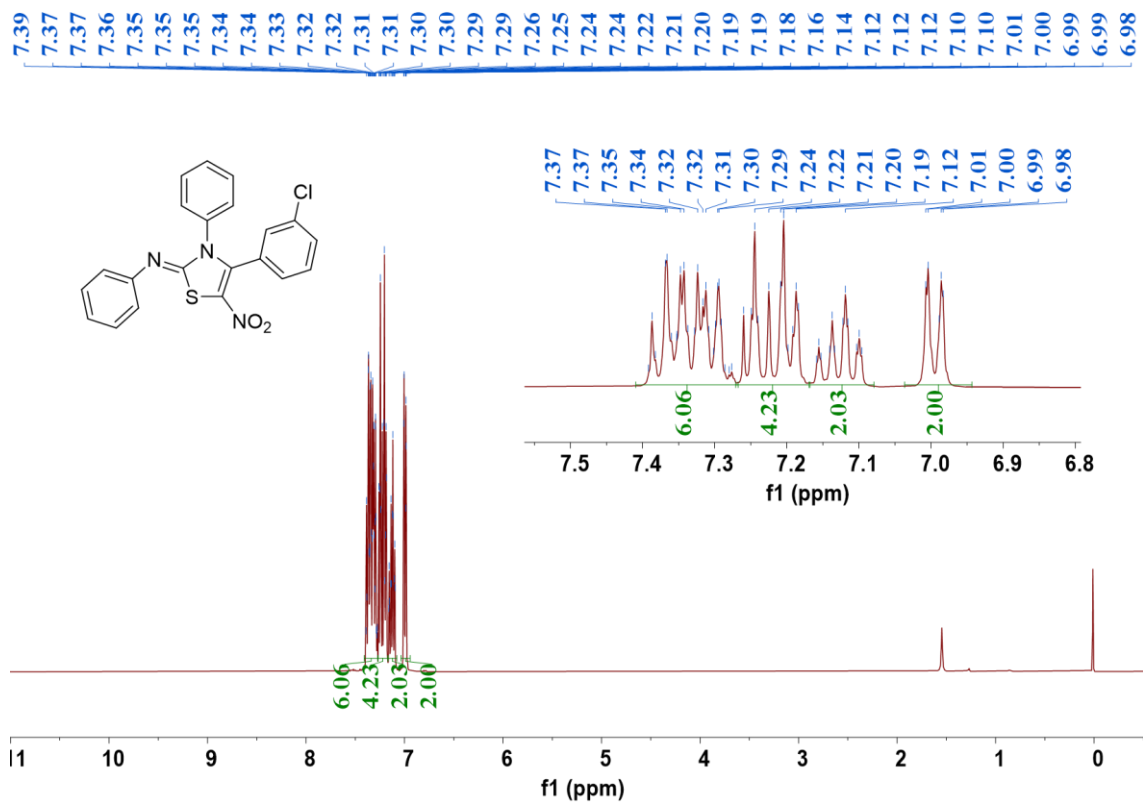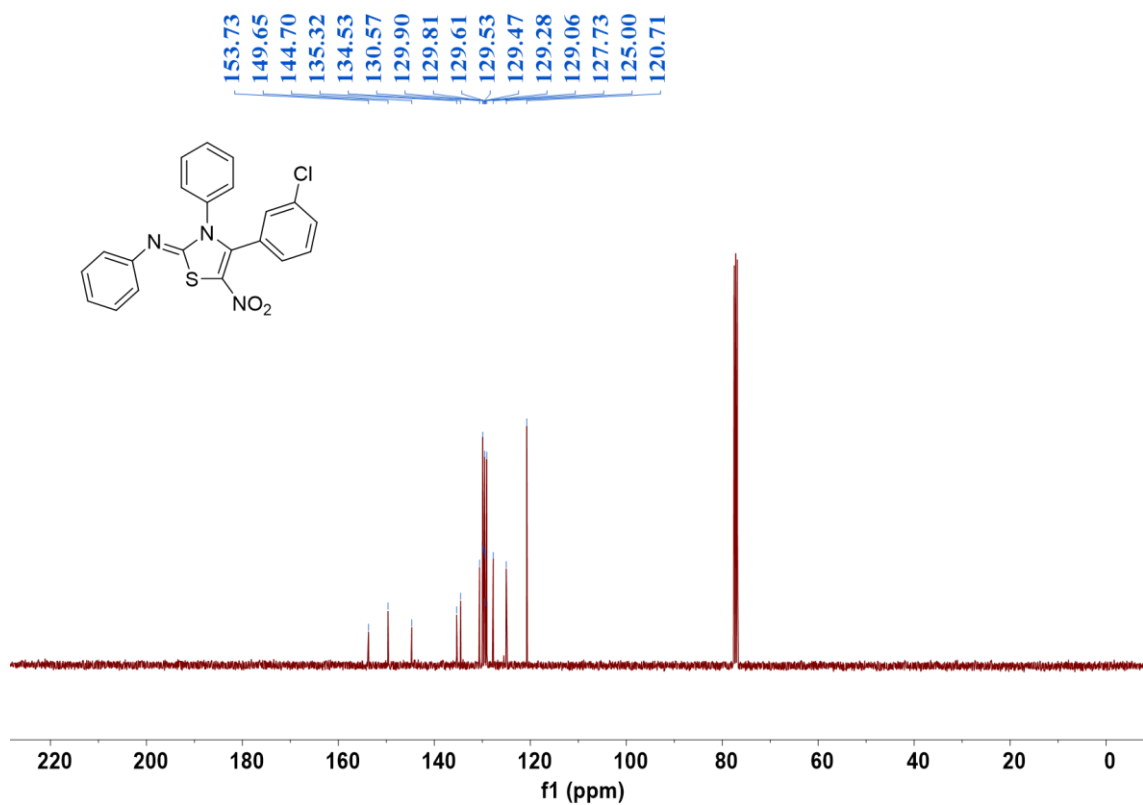

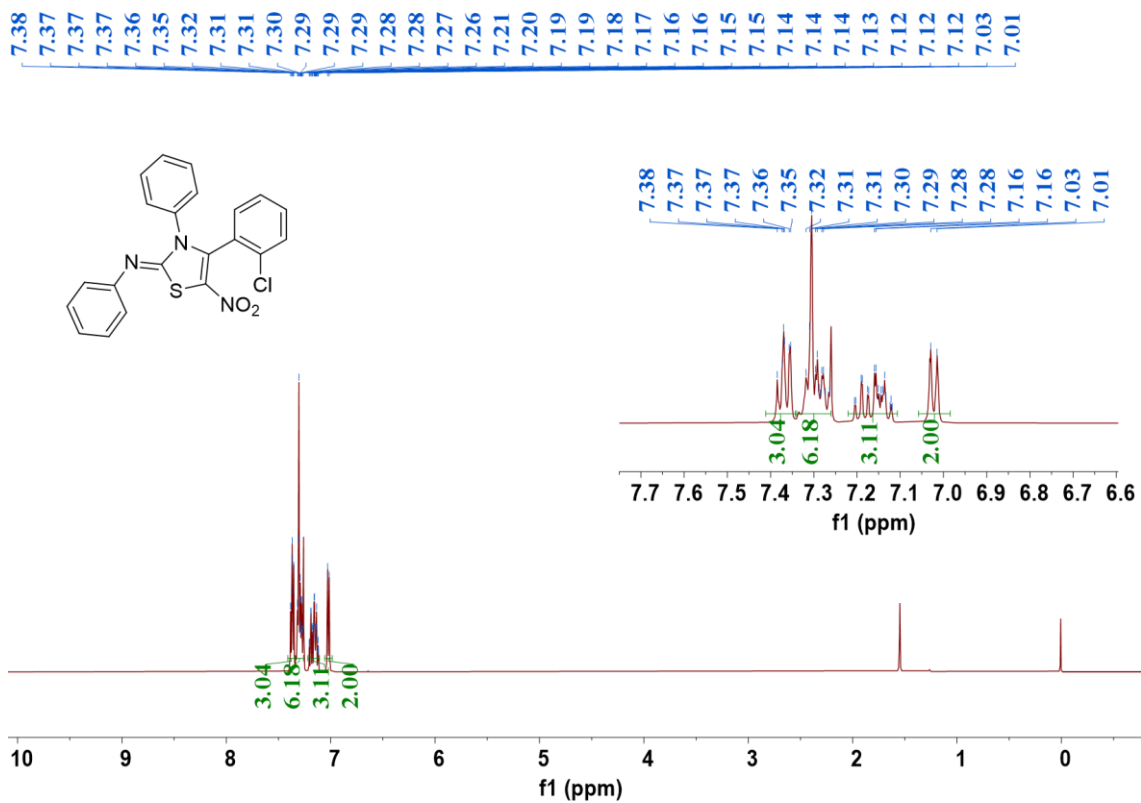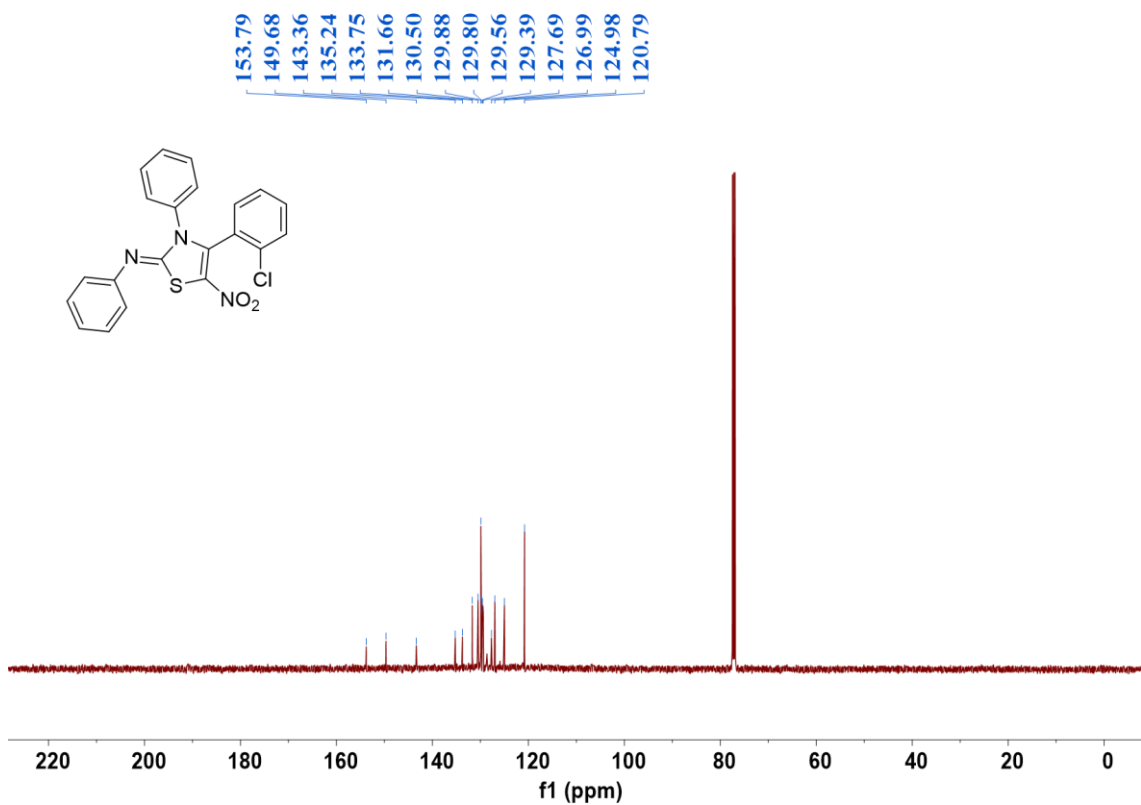

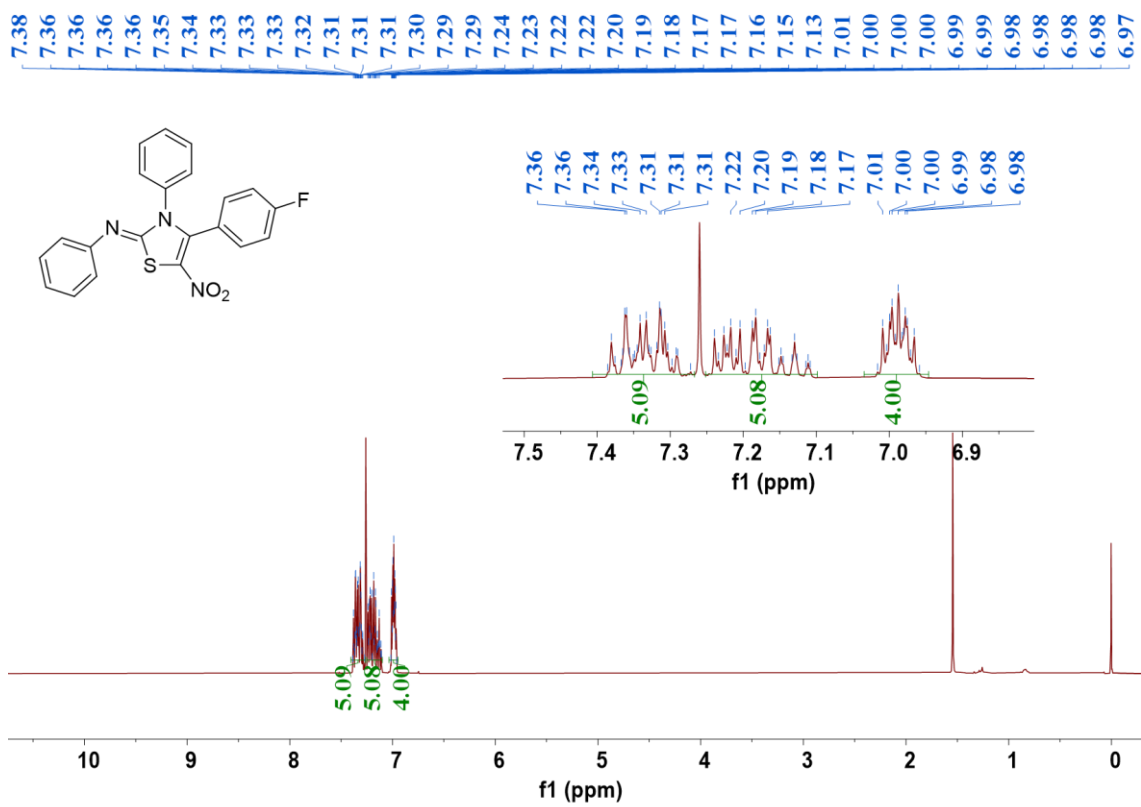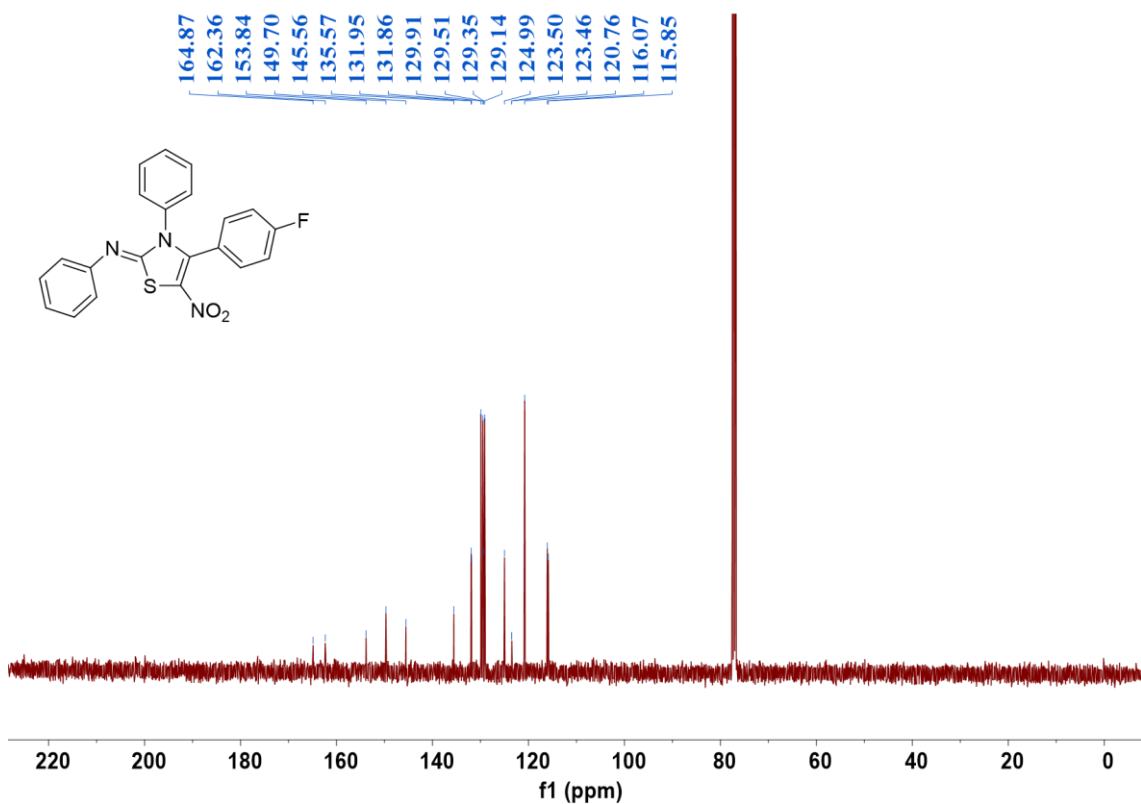

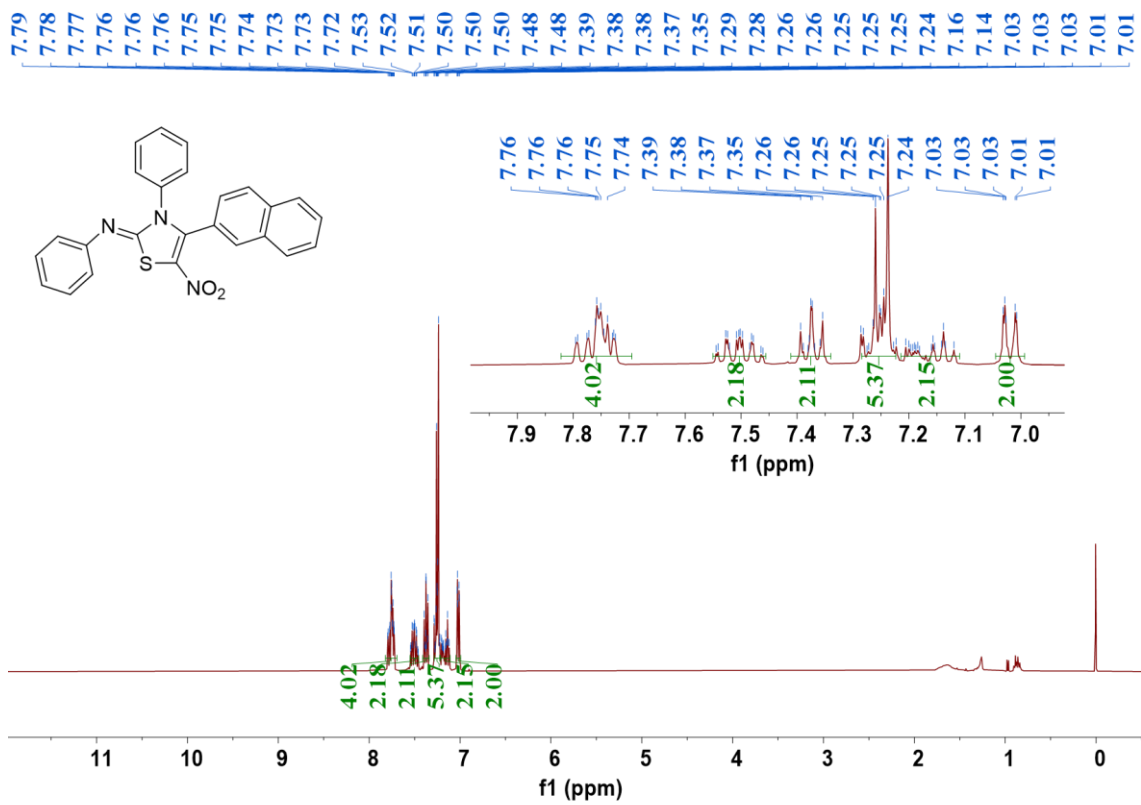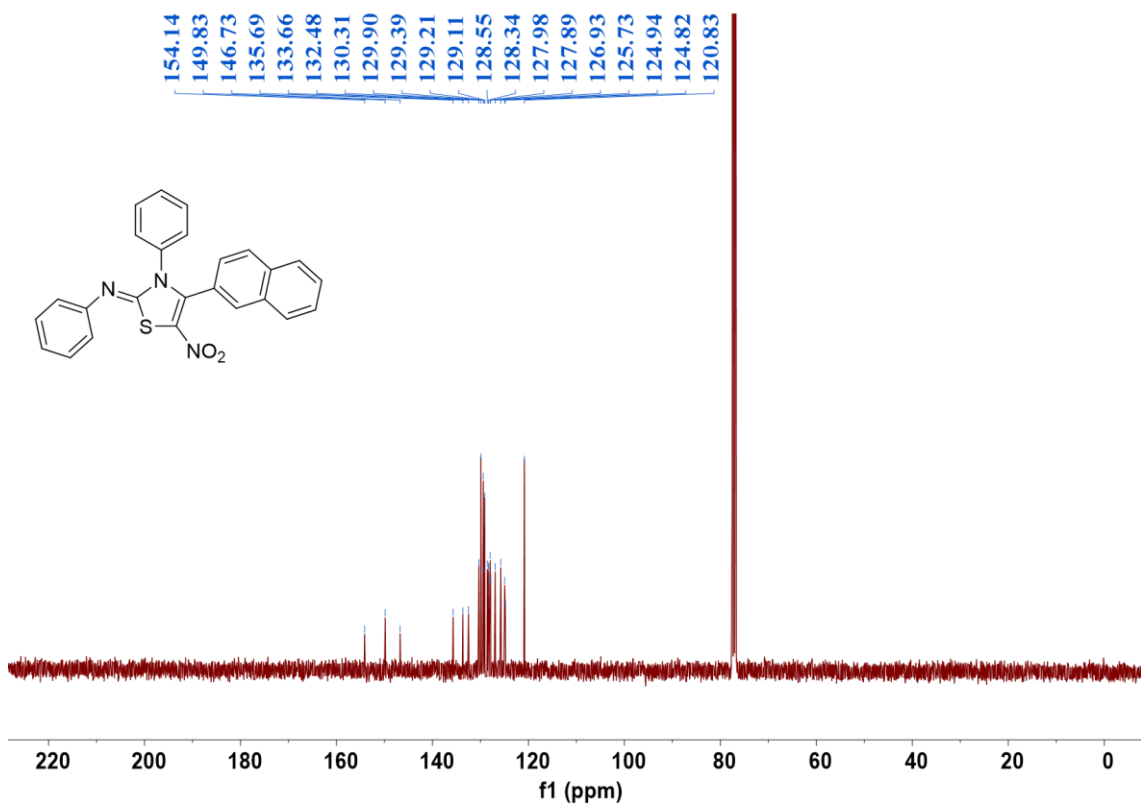



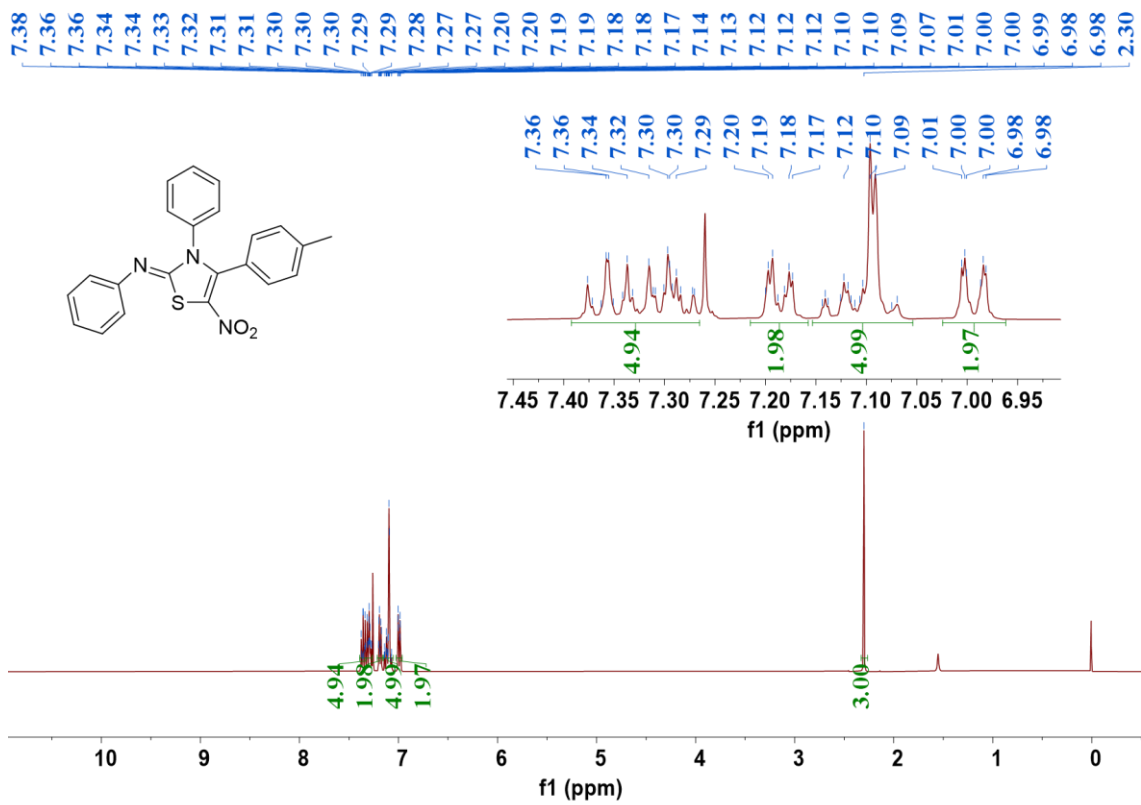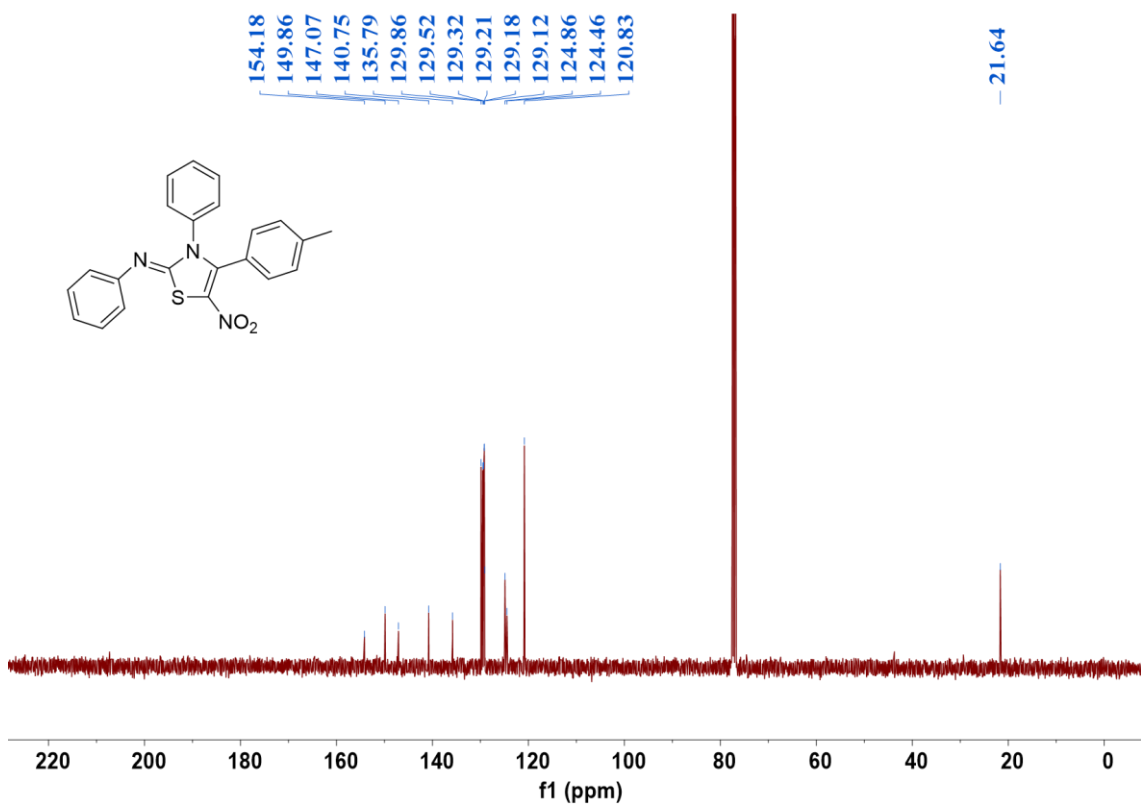

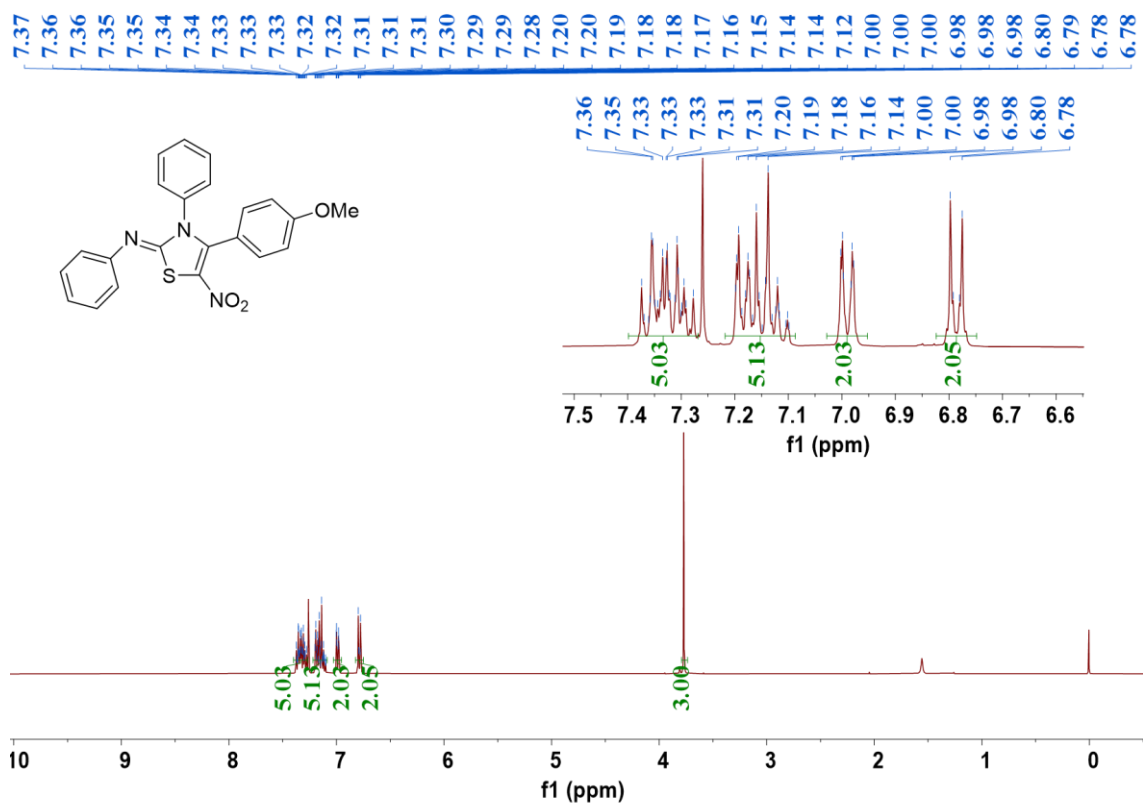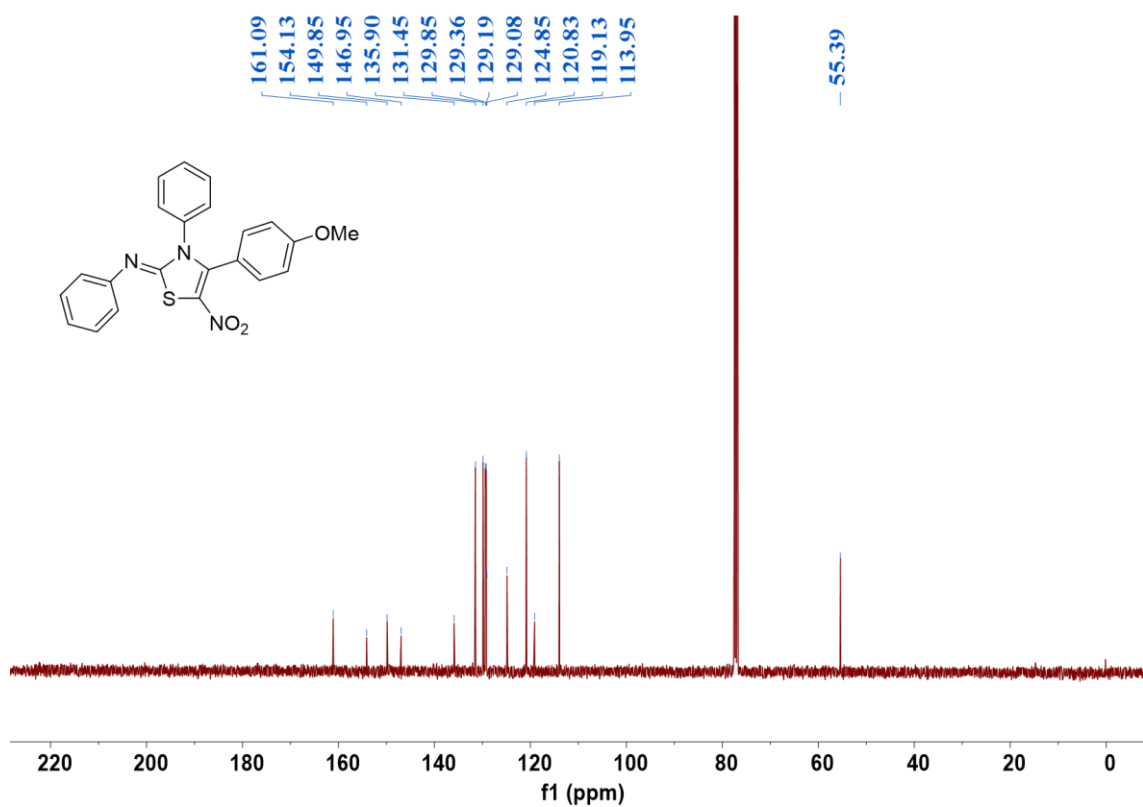

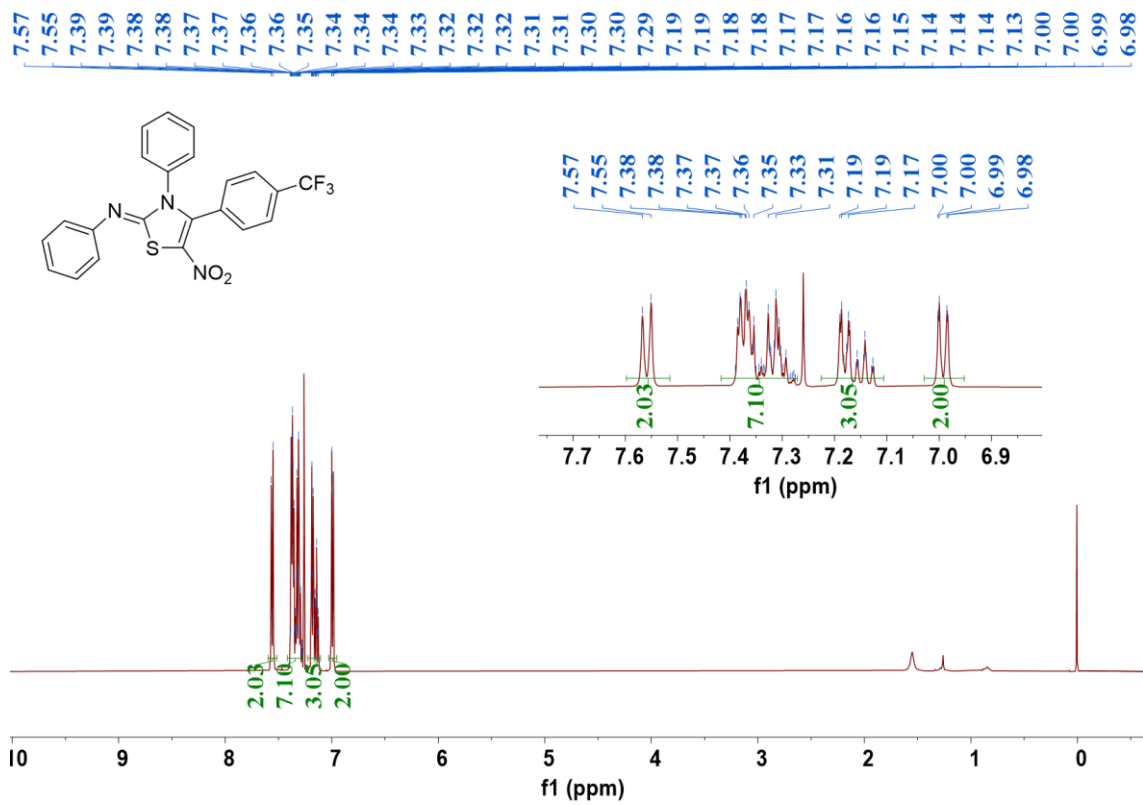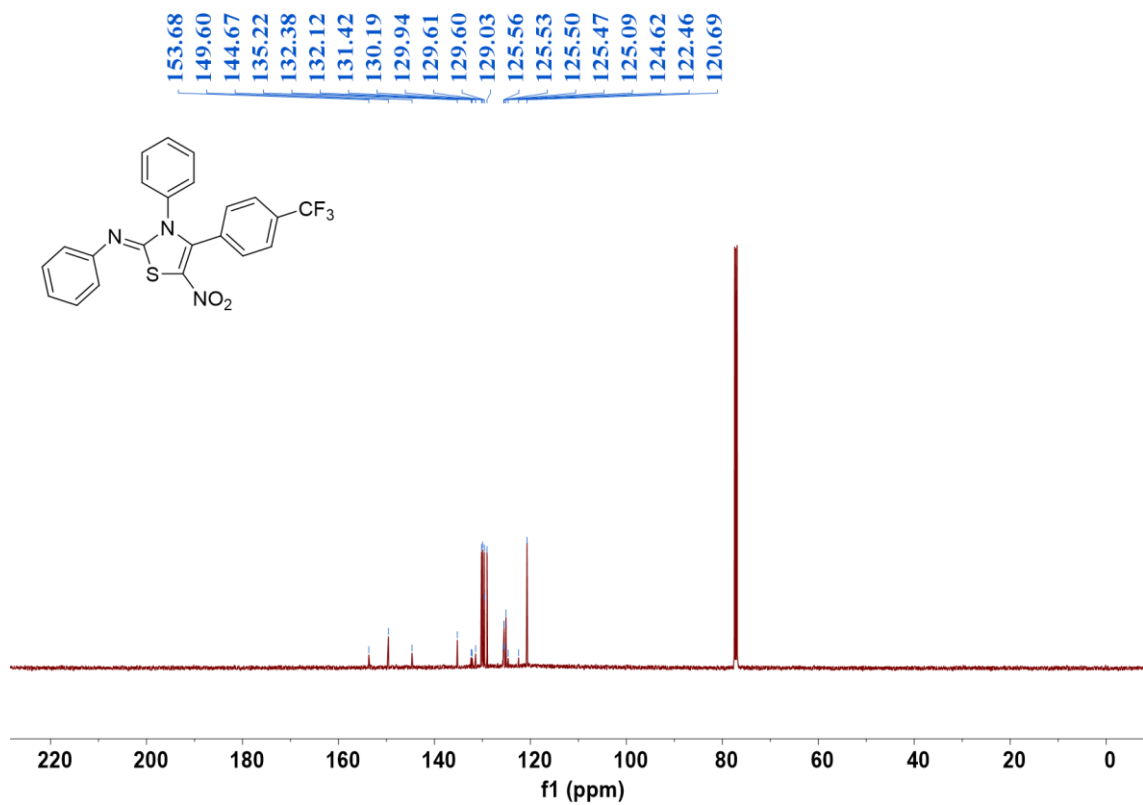

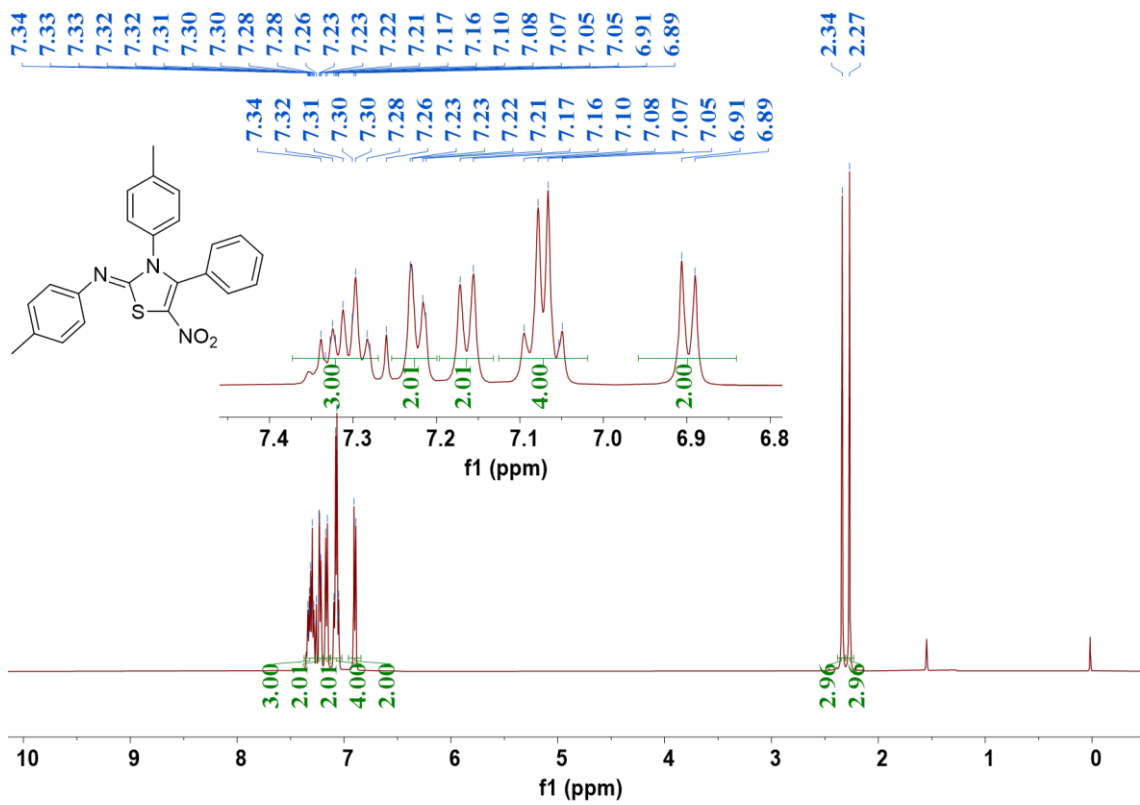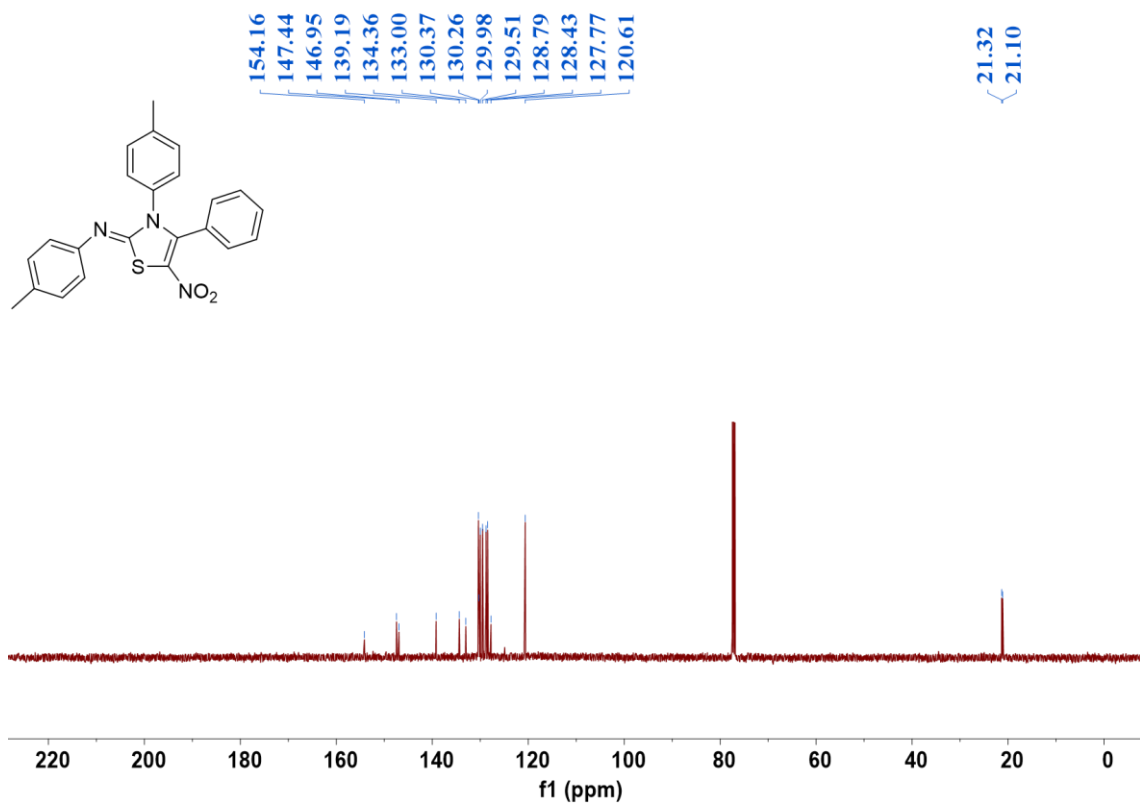

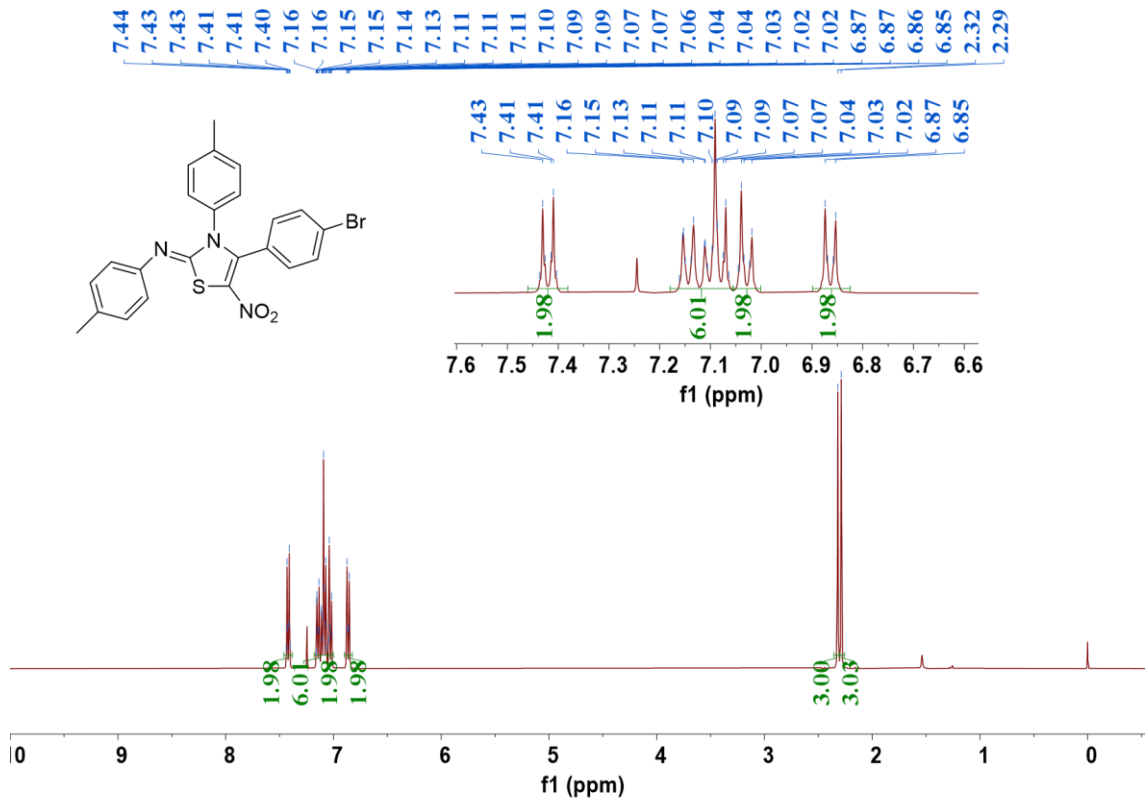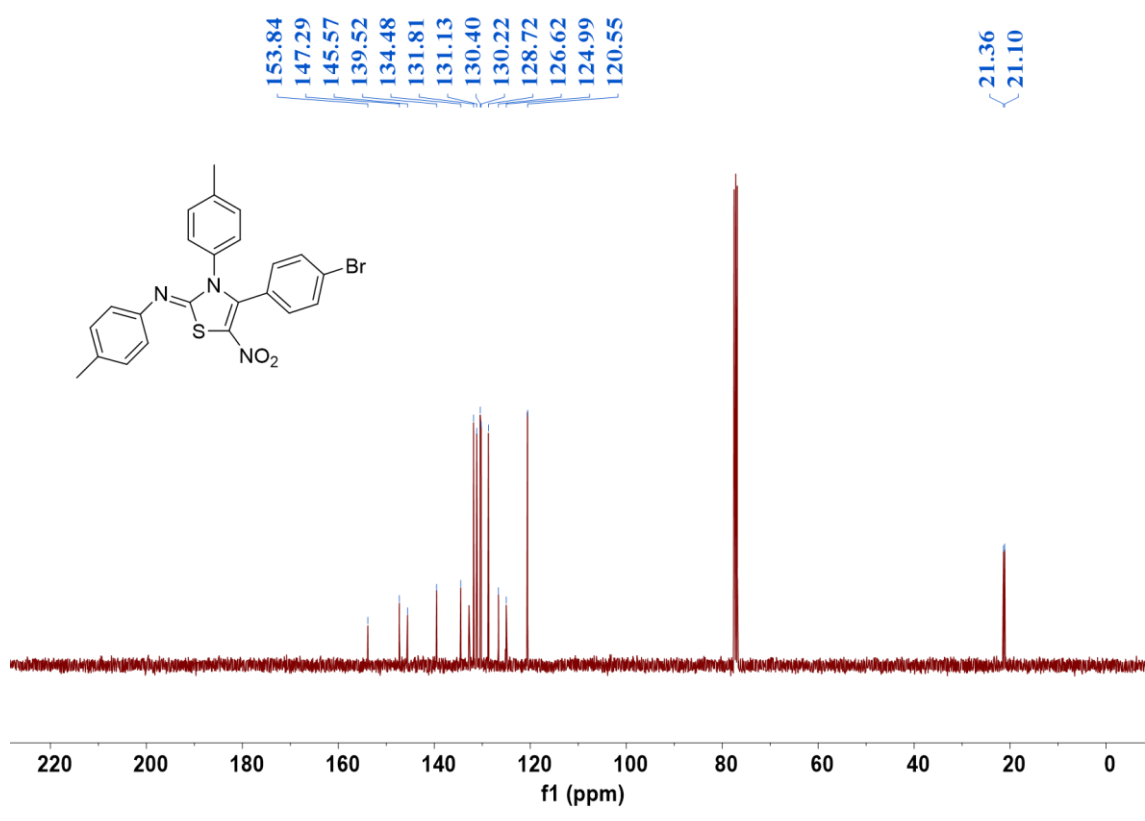

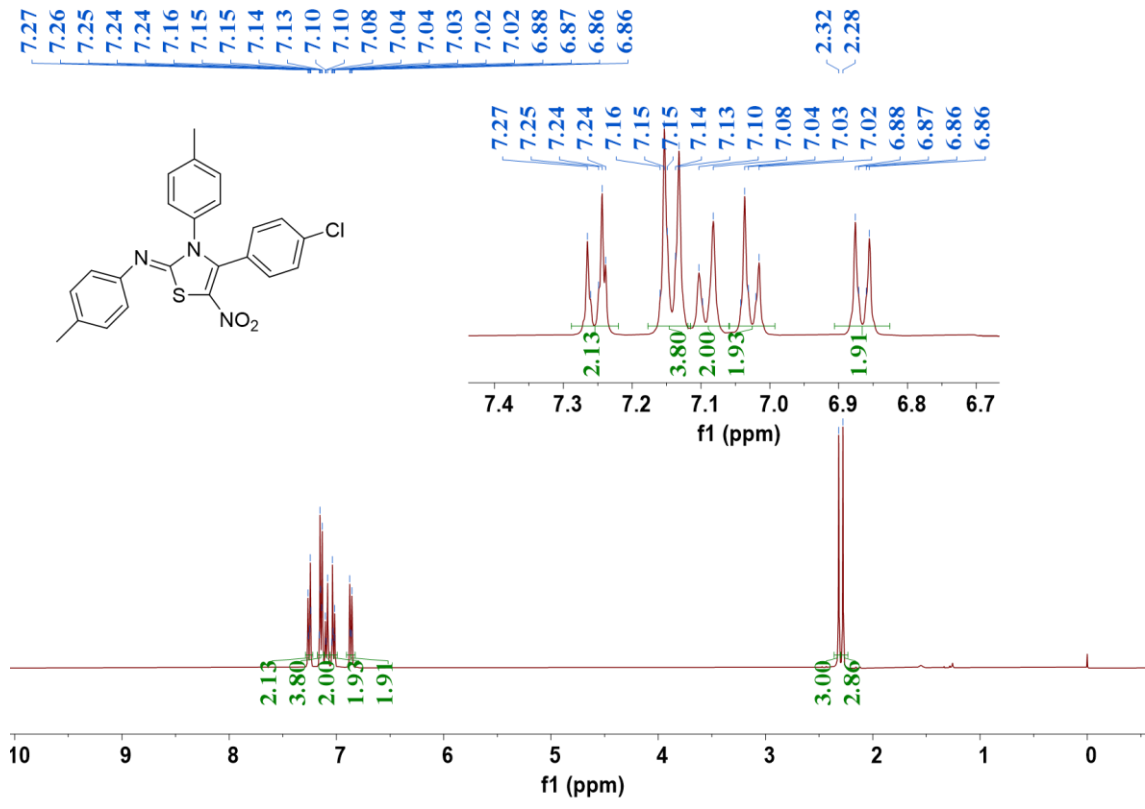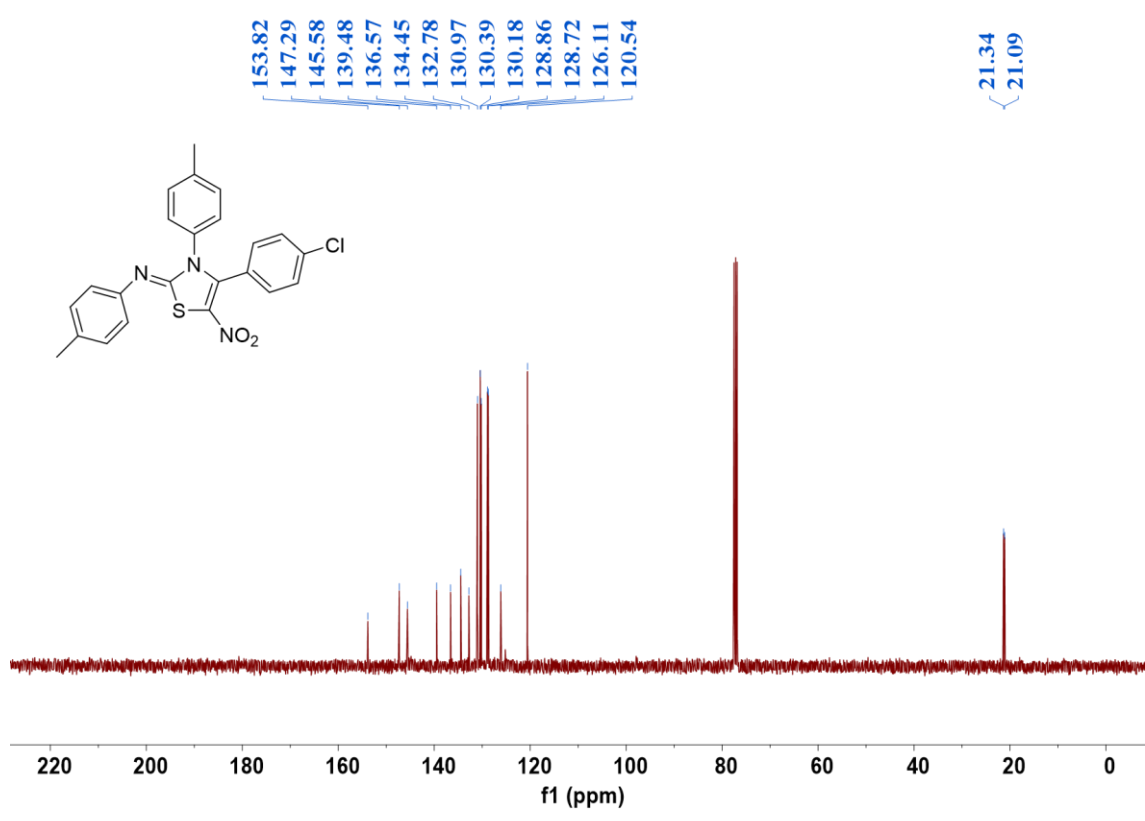

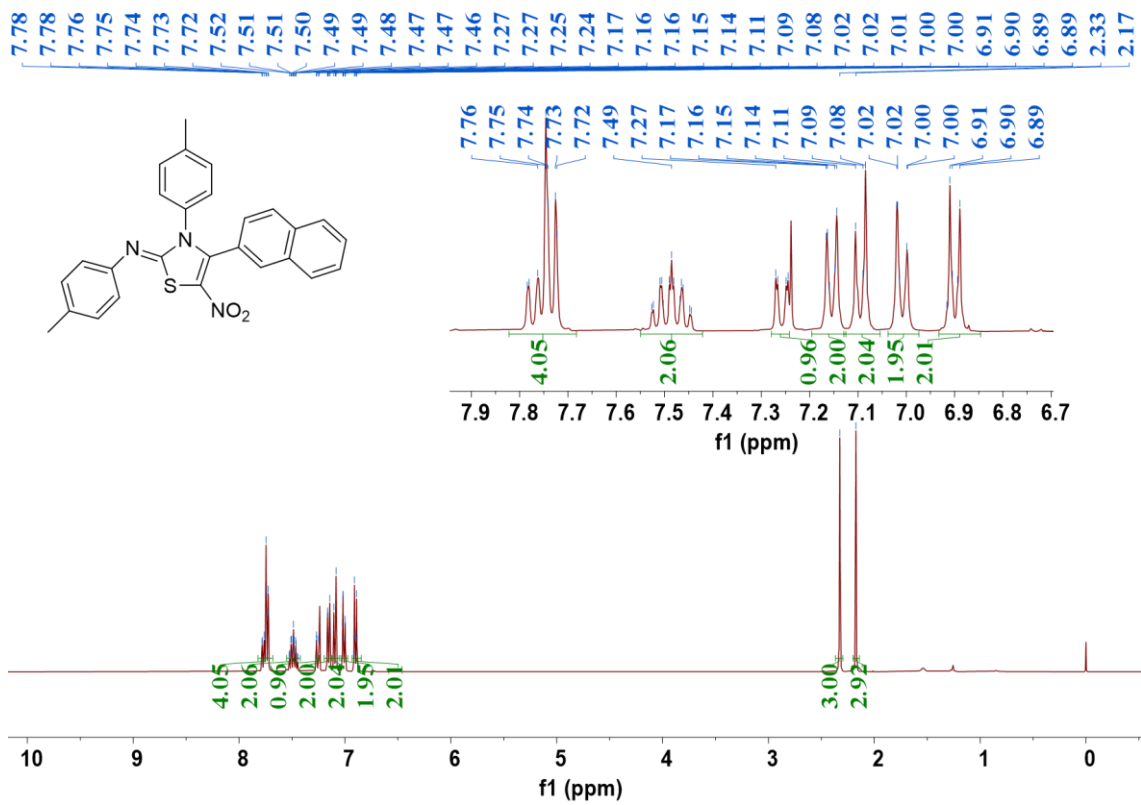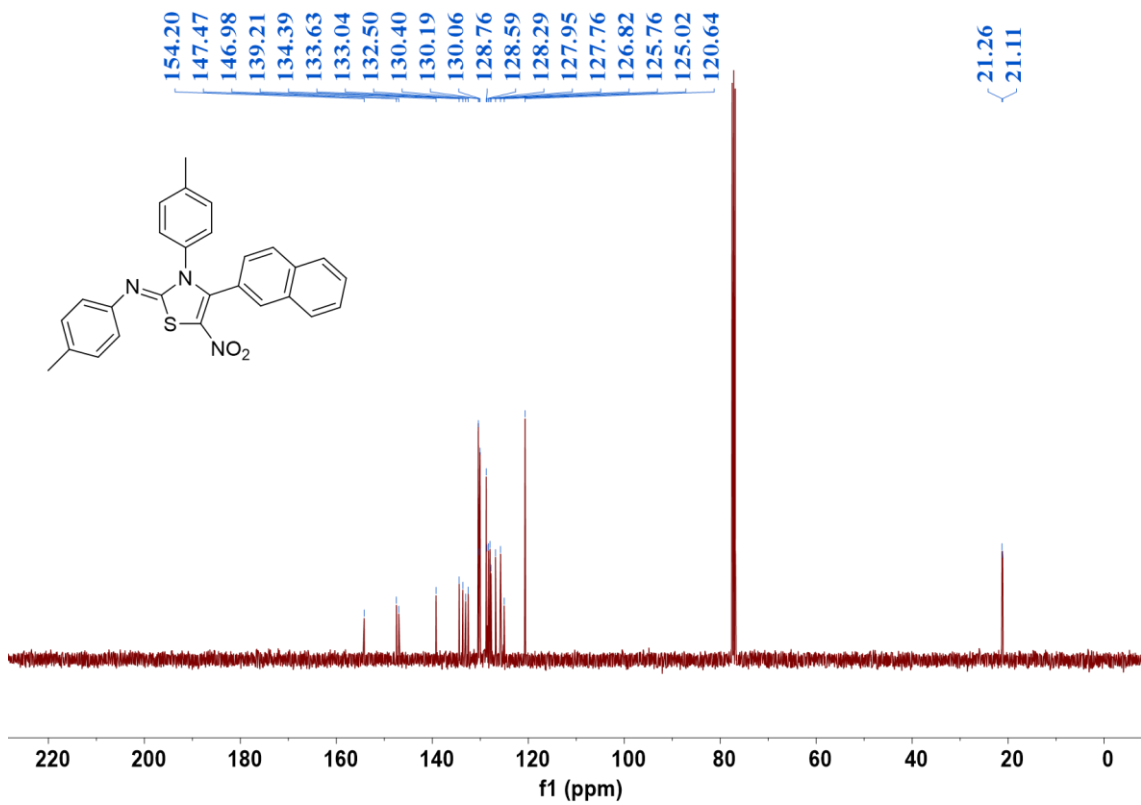

Supplement: d0ra00686f1.pdf [file d0ra00686f1.pdf]
